# Supplementary material
Source: PubMed Central journal article supplement (PMC4613622)
Supplement: npp201577x2.pdf [file npp201577x2.pdf]

# Supplementary Figure S1

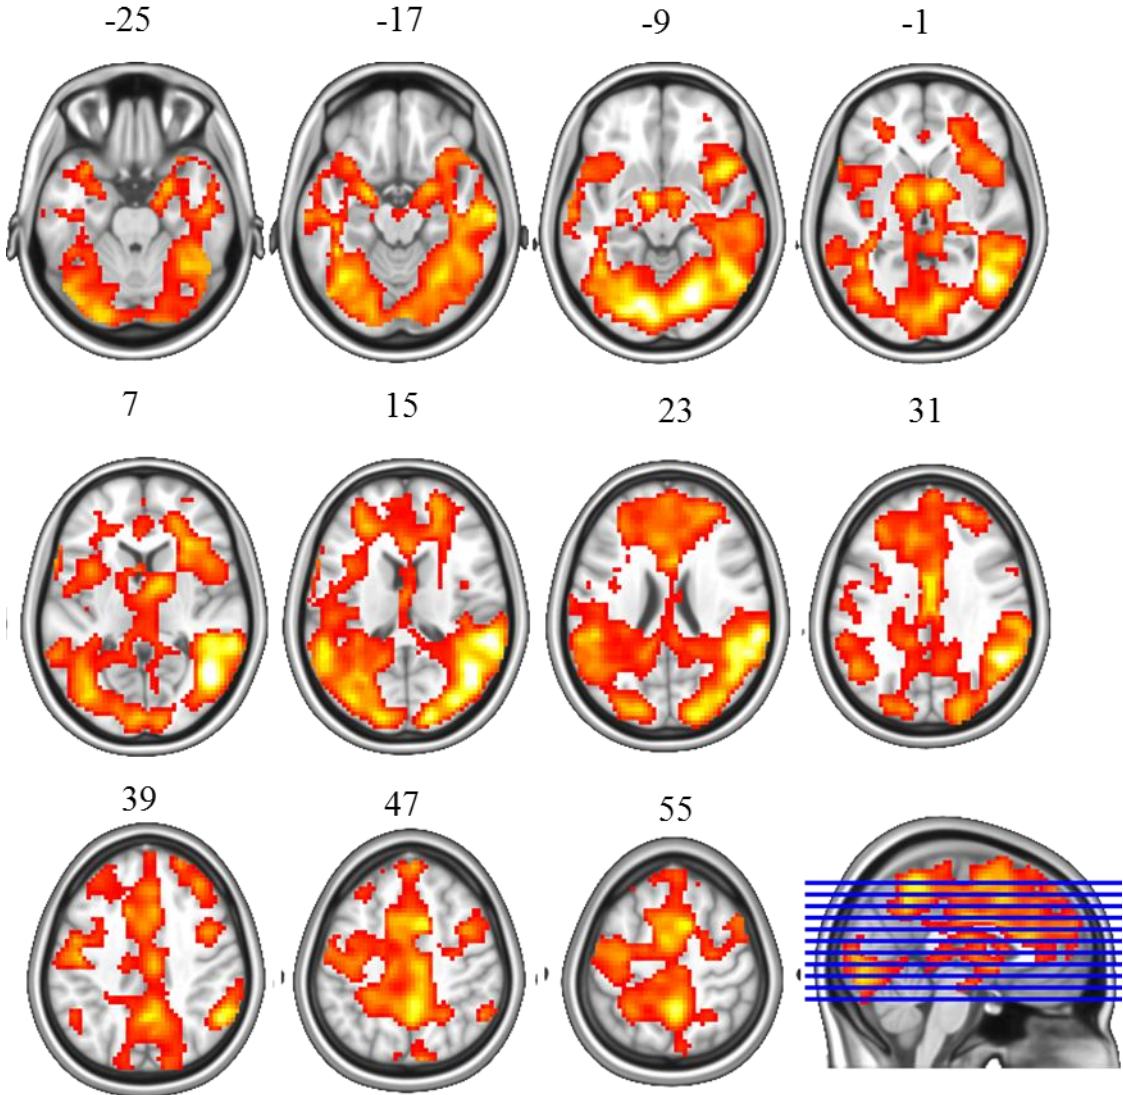

**Figure S1:** Regions differentially activated in the MIST experimental > control contrast (i.e. stress-related activity). Shown at  $p < 0.001$  uncorrected. Numbers indicate z-coordinates in MNI space.

## Supplementary Figure S2

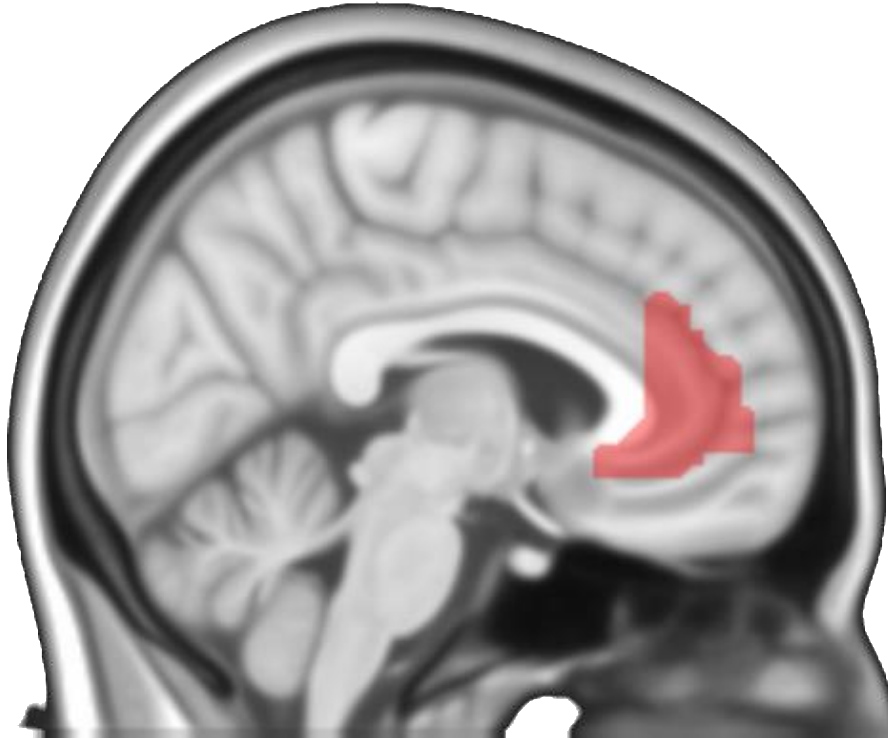

**Figure S2:** pACC mask used for region of interest definition.
